# Supplementary material for: Hypermethylation of nc886 in HPV-positive oropharyngeal cancer and its clinical implications: An epigenome-wide association study
Source: PubMed Central journal article supplement — Mol Ther Nucleic Acids. 2022 Nov 17;30:596–605. doi: 10.1016/j.omtn.2022.11.012 (PMC9722395; doi:10.1016/j.omtn.2022.11.012), 2022-11-17
Supplement: mmc1.pdf [file mmc1.pdf]

OMTN, Volume 30

## Supplemental information

**Hypermethylation of *nc886* in HPV-positive  
oropharyngeal cancer and its clinical implications:**

**An epigenome-wide association study**

**Yifan Xu, Ziqiao Wang, Peng Wei, Richa Gairola, Karl T. Kelsey, Andrew G. Sikora, Guojun Li, and Jian Gu**

**Table S1. Significantly differentially methylated CpG sites (DMCs) in leukocytes DNA between HPV(+) and HPV(-) OPSCC patients ( $q$ -value < 0.05 and  $d > 5$ ).**

| CpG ID            | Chr.         | Gene                  | Relation to CpG Island | Enhancer    | DNase Hypersensitivity   | Effect Size ( $\Delta\beta$ value*) |
|-------------------|--------------|-----------------------|------------------------|-------------|--------------------------|-------------------------------------|
| cg09319777        | chr1         | MAST2                 | OpenSea                |             | chr1:46496425-46496975   | -0.0279                             |
| cg15524170        | chr11        | CD82                  | OpenSea                |             |                          | -0.0256                             |
| cg19601138        | chr10        | FAM107B               | OpenSea                | TRUE        |                          | -0.0198                             |
| cg13987862        | chr9         | FKBP15                | OpenSea                |             |                          | -0.0147                             |
| cg19762564        | chr5         |                       | OpenSea                | TRUE        |                          | -0.0105                             |
| <b>cg10702669</b> | <b>chr16</b> | <b>TBC1D24</b>        | <b>Island</b>          |             |                          | <b>-0.0172</b>                      |
| cg12153399        | chr9         | SLC34A3               | N-Shelf                |             |                          | -0.0242                             |
| cg05483391        | chr3         | FOXP1                 | OpenSea                | TRUE        | chr3:71608880-71609255   | -0.0499                             |
| cg11690063        | chr7         | GLCCI1                | OpenSea                |             |                          | -0.0113                             |
| cg10356363        | chr20        | CEBPB;CEBPB-AS1       | N-Shore                |             |                          | -0.0140                             |
| cg05772134        | chr1         |                       | OpenSea                |             | chr1:172972240-172972635 | -0.0407                             |
| cg13989666        | chr11        | UVRAG                 | OpenSea                |             |                          | -0.0103                             |
| cg12380967        | chr17        | MYO1D                 | OpenSea                |             |                          | -0.0107                             |
| cg13959440        | chr8         |                       | OpenSea                |             | chr8:108767765-108768055 | -0.0206                             |
| cg25885356        | chr21        | RUNX1                 | OpenSea                |             | chr21:36297125-36297610  | -0.0411                             |
| cg10291991        | chr1         |                       | OpenSea                |             | chr1:206914425-206914795 | -0.0150                             |
| cg20993386        | chr17        | PITPNC1               | OpenSea                | TRUE        | chr17:65408145-65408650  | -0.0196                             |
| cg13630250        | chr14        | COX16                 | S-Shore                |             |                          | -0.0770                             |
| cg16204524        | chr2         | GPR113                | N-Shelf                |             | chr2:26565705-26566150   | -0.0091                             |
| cg04874511        | chr13        | CAB39L                | OpenSea                | TRUE        |                          | -0.0120                             |
| cg23344459        | chr8         |                       | OpenSea                |             | chr8:135356925-135357215 | -0.0304                             |
| cg15630215        | chr2         | DQX1                  | OpenSea                |             |                          | -0.0266                             |
| cg07517948        | chr15        |                       | OpenSea                | TRUE        |                          | -0.0272                             |
| cg26831184        | chr1         |                       | OpenSea                |             |                          | -0.0140                             |
| <b>cg25090325</b> | <b>chr3</b>  | <b>AMIGO3; RNF123</b> | <b>Island</b>          | <b>TRUE</b> |                          | <b>-0.0390</b>                      |

$\Delta\beta$  value: the  $\beta$  value of HPV(+) patients minus  $\beta$  value of HPV(-) patients.

**Table S2. Reactome pathways enriched in pathway enrichment analysis**

| <b>Pathway</b>              | <b>Fold enrichment</b> | <b>Raw p-value</b>    | <b>FDR q-value</b> |
|-----------------------------|------------------------|-----------------------|--------------------|
| Chromatin modifying enzymes | 2.75                   | $1.51 \times 10^{-5}$ | 0.0331             |
| Chromatin organization      | 2.75                   | $1.51 \times 10^{-5}$ | 0.0166             |
| Olfactory Signaling Pathway | 0.12                   | $2.42 \times 10^{-5}$ | 0.0177             |
